# Supplementary material for: The Warburg Effect Mediator Pyruvate Kinase M2 Expression and Regulation in the Retina
Source: PubMed Central journal article supplement (PMC5121888; doi:10.1038/srep37727), 2016-11-24

# The Warburg Effect Mediator Pyruvate Kinase M2 Expression and Regulation in the Retina

Raju V.S. Rajala<sup>1, 2, 3, 4, 5</sup>, Ammaji Rajala<sup>1, 4</sup>, Christopher Kooker<sup>1, 4, 5</sup>, Yuhong Wang<sup>1, 4</sup>, and Robert E. Anderson<sup>1, 3, 4, 5</sup>

From the Departments of <sup>1</sup>Ophthalmology, <sup>2</sup>Physiology, and <sup>3</sup>Cell Biology, University of Oklahoma Health Sciences Center, Oklahoma City, OK; <sup>4</sup>Dean McGee Eye Institute, <sup>5</sup>Oklahoma Center for Neuroscience, Oklahoma City, OK, USA

**Figure 3**

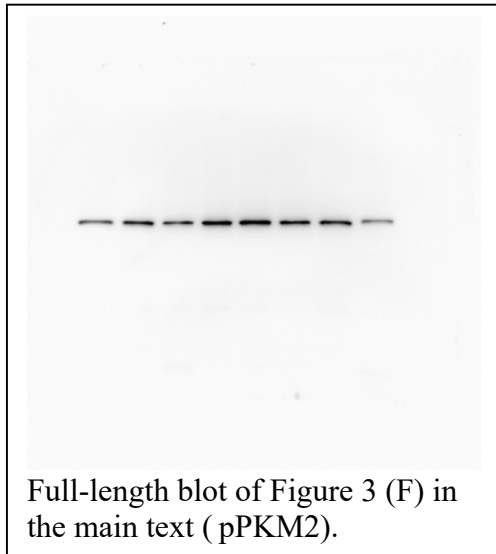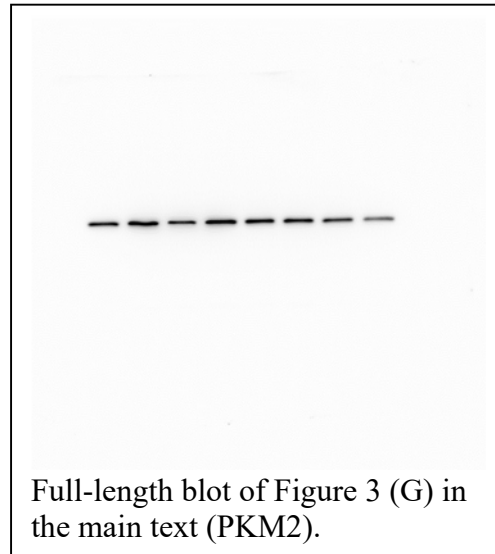

**Figure 5**

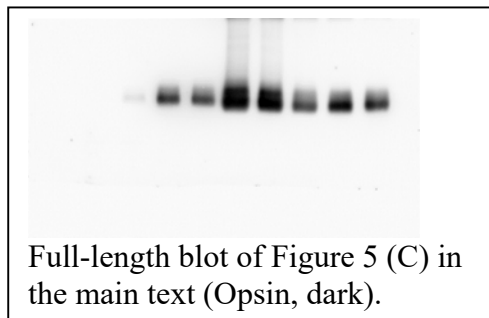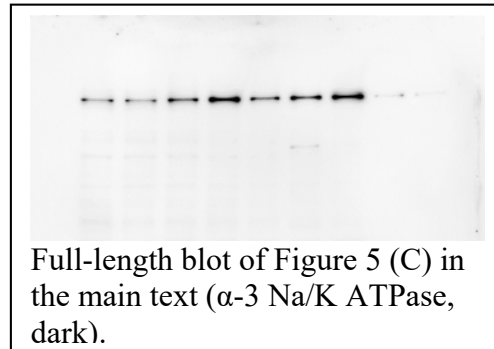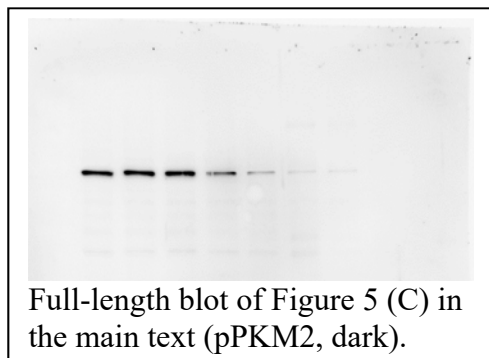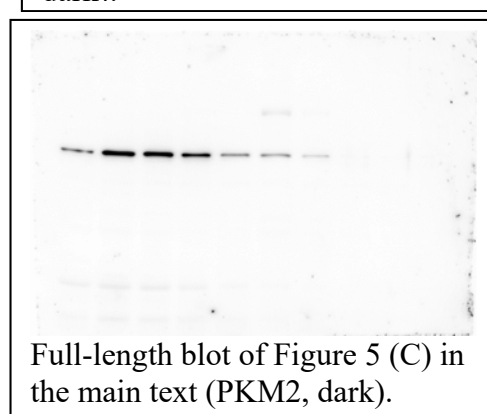

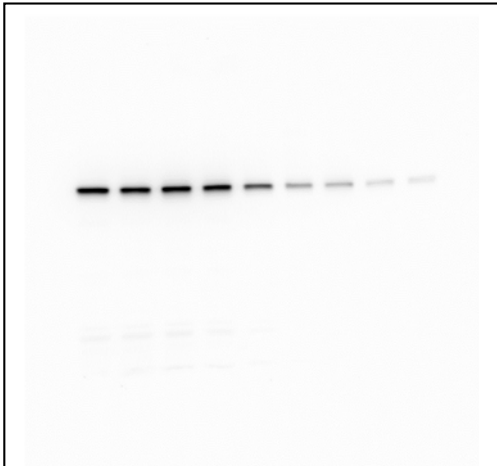

Full-length blot of Figure 5 (C) in the main text (PKM1, dark).

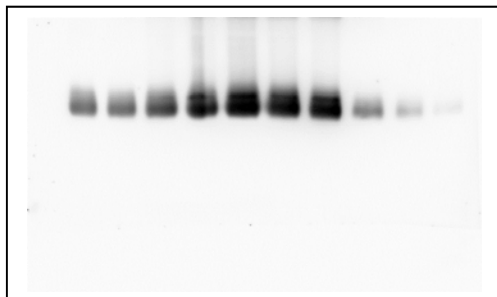

Full-length blot of Figure 5 (C) in the main text (Opsin, light).

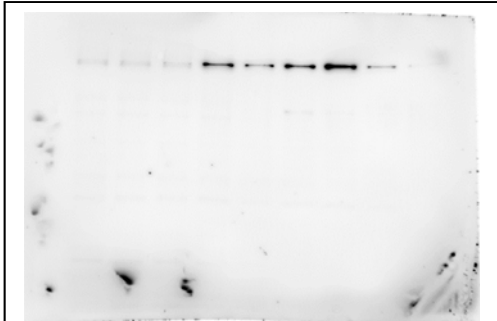

Full-length blot of Figure 5 (C) in the main text ( $\alpha$ -3 Na/K ATPase light).

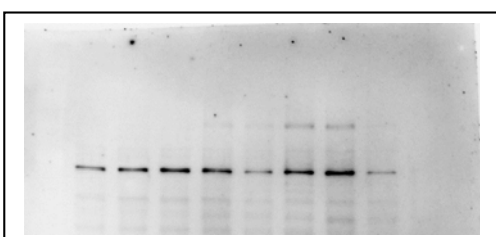

Full-length blot of Figure 5 (C) in the main text (pPKM2, light).

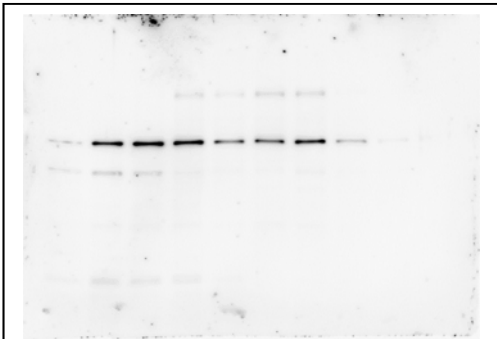

Full-length blot of Figure 5 (C) in the main text (PKM2, light).

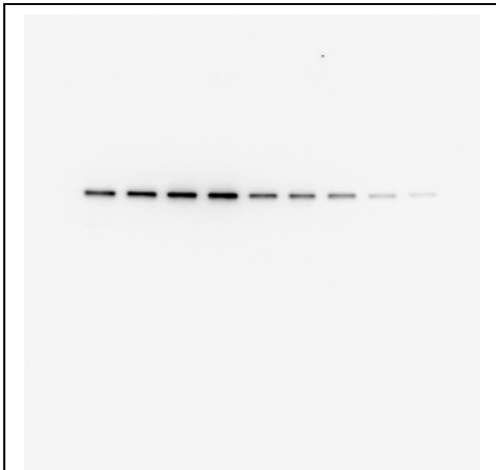

Full-length blot of Figure 5 (C) in the main text (PKM1, light).

**Figure 6**

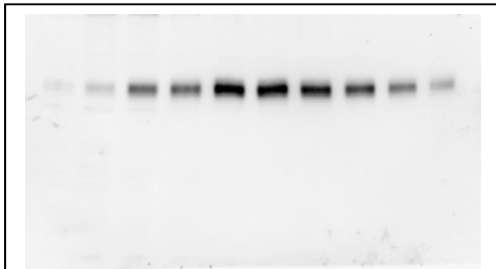

Full-length blot of Figure 6 (B) in the main text (M-opsin).

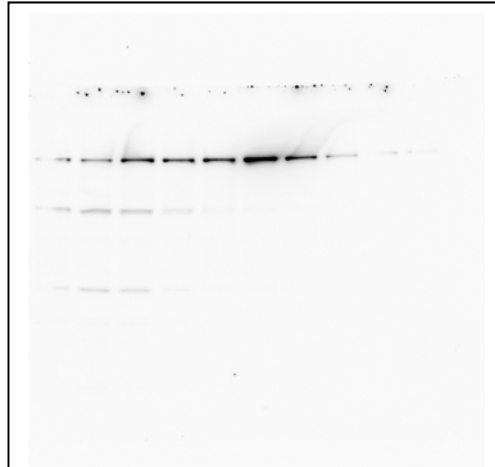

Full-length blot of Figure 6 (B) in the main text ( $\alpha$ -3 Na/K ATPase).

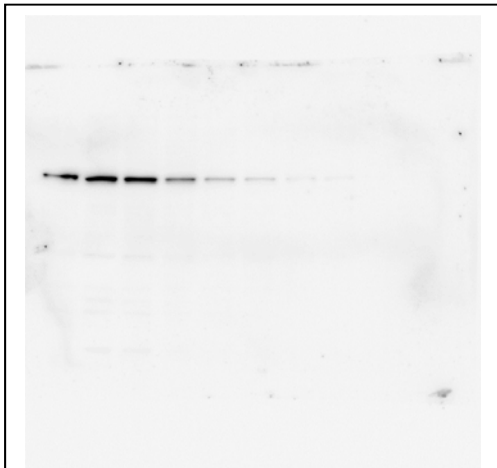

Full-length blot of Figure 6 (B) in the main text (pPKM2).

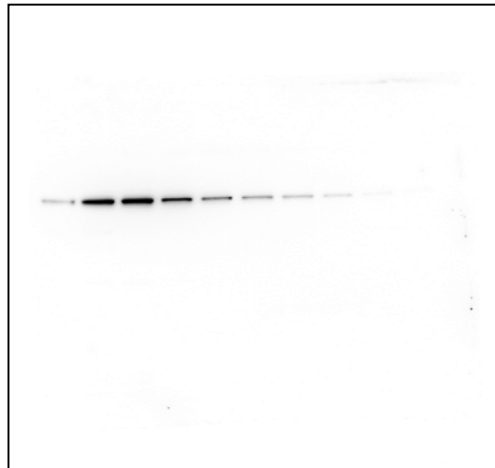

Full-length blot of Figure 6 (B) in the main text (PKM2).

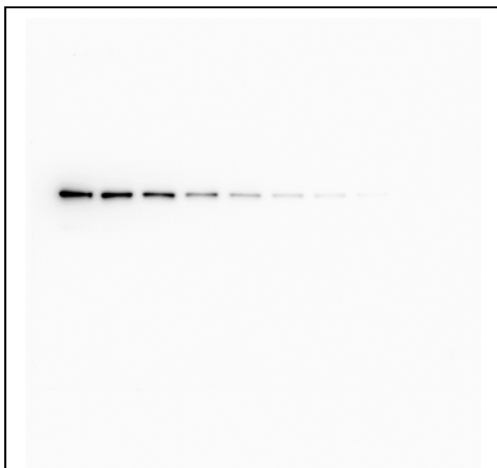

Full-length blot of Figure 6 (B) in the main text (PKM1).

**Figure 7**

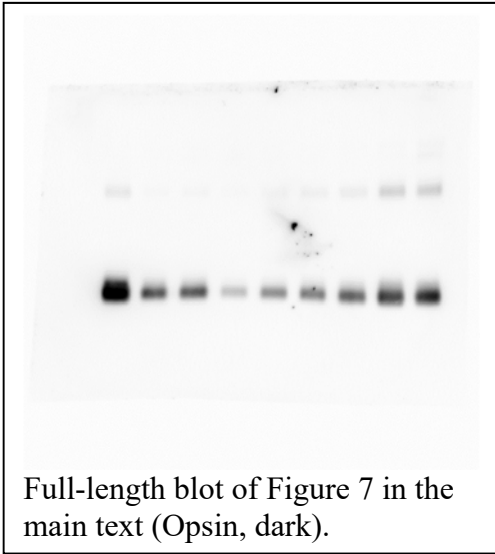

Full-length blot of Figure 7 in the main text (Opsin, dark).

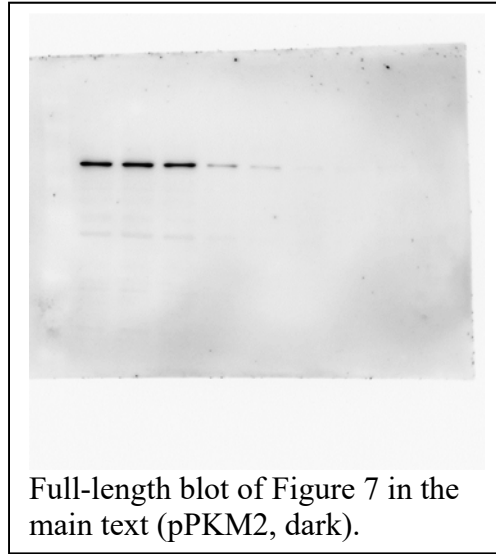

Full-length blot of Figure 7 in the main text (pPKM2, dark).

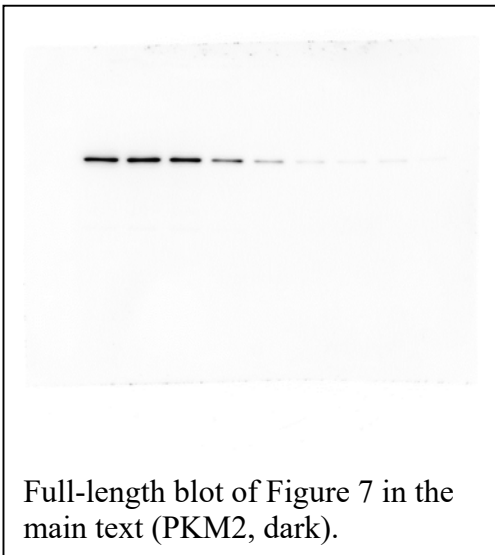

Full-length blot of Figure 7 in the main text (PKM2, dark).

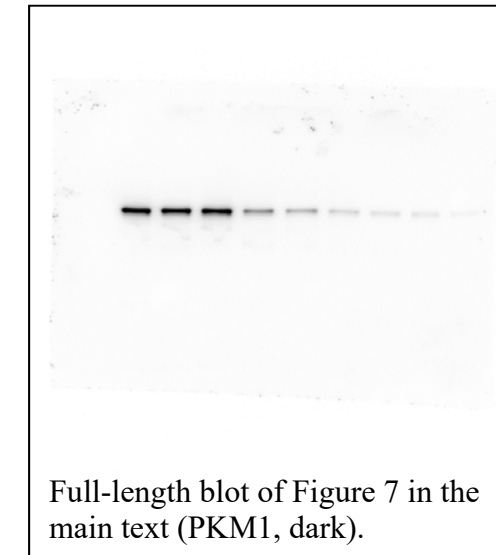

Full-length blot of Figure 7 in the main text (PKM1, dark).

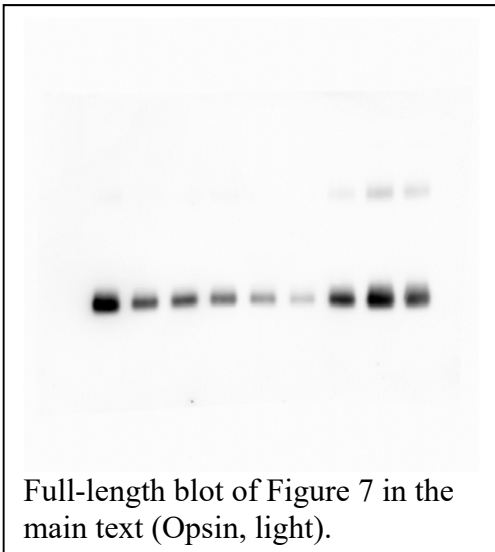

Full-length blot of Figure 7 in the main text (Opsin, light).

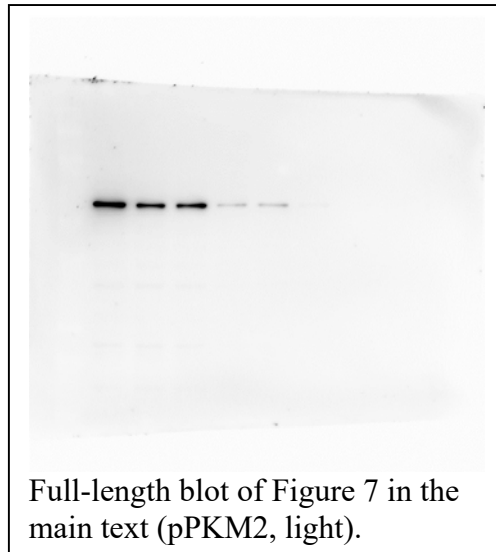

Full-length blot of Figure 7 in the main text (pPKM2, light).

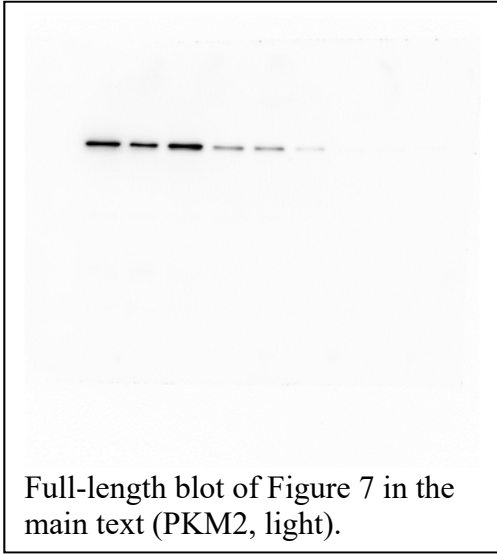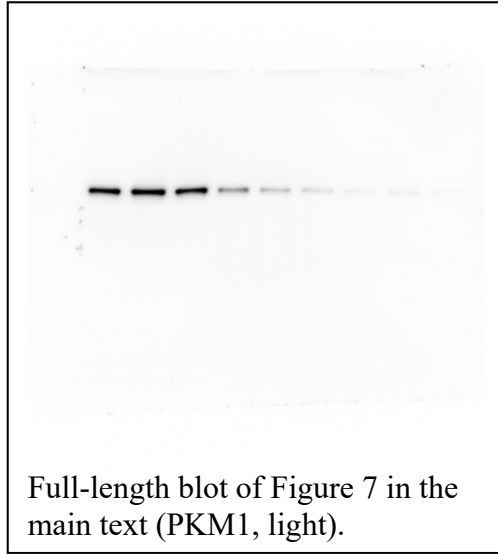

**Figure 8**

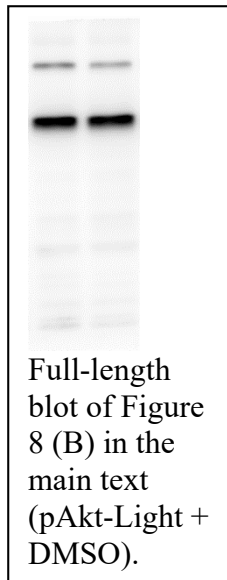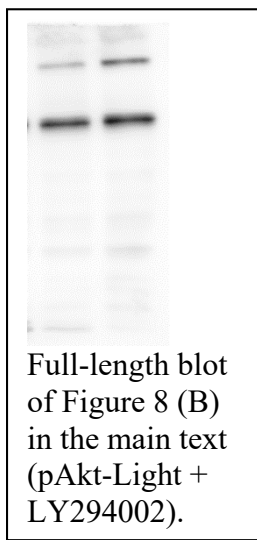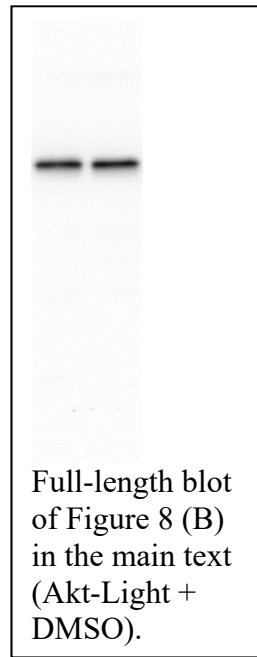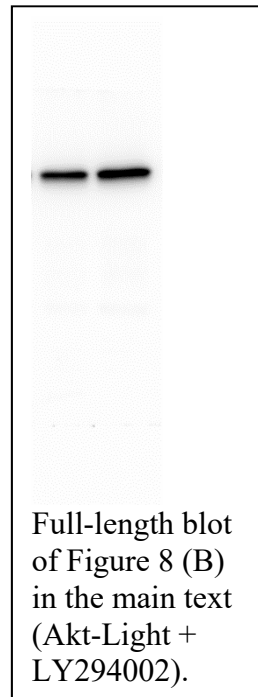

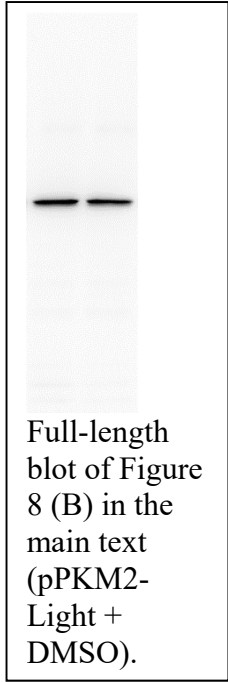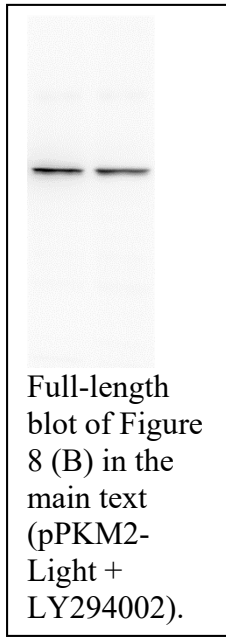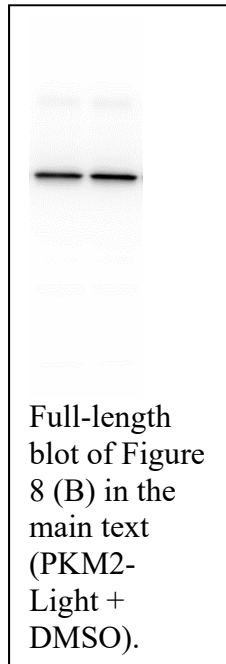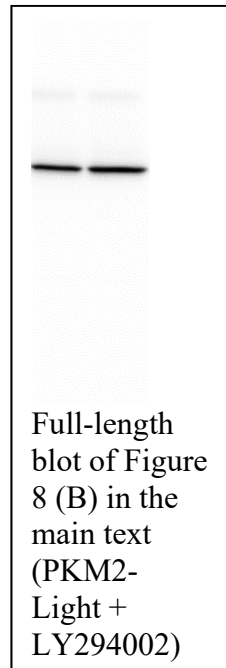

Supplement: srep37727-s1.pdf [file srep37727-s1.pdf]
